# Supplementary material for: Synergistic nanofibrous adsorbent for uranium extraction from seawater
Source: Royal Society of Chemistry journal article supplement (doi:10.1039/c6ra18785d), 2016-01-01
Supplement: c6ra18785d1.pdf [file c6ra18785d1.pdf]

**Electronic supplementary information for**

## **Synergistic Nanofibrous Adsorbent for Uranium Extraction from Seawater**

Bowu Zhang,<sup>a,‡,\*</sup> Xiaojing Guo,<sup>a,‡</sup> Siyuan Xie,<sup>a,b</sup> Xiyan Liu,<sup>a</sup> Changjian Ling,<sup>a</sup> Hongjuan Ma,<sup>a</sup> Ming Yu,<sup>a</sup> and Jingye  
Li<sup>a,\*</sup>

<sup>a</sup> *CAS Center for Innovation in Advanced Nuclear Energy, Shanghai Institute of Applied Physics, Chinese Academy of Sciences, No. 2019 Jialuo Rd., Jiading Dist., Shanghai, 201800, China.*

<sup>b</sup> *Patent Examination Cooperation Center of the Patent Office, State Intellectual Property Office of the P. R. China, No. 55 Fengchan Rd., Jinshui Dist., Zhengzhou, 450002, China*

<sup>‡</sup> *They are the co-first authors of this work. Correspondence and requests for materials should be addressed to B.*

*Zhang (E-mail: zhangbowu@foxmail.com) or J. Li (E-mail: jingyeli@sinap.ac.cn)*

## Supplementary Tables

**Table S1.** Composition of composite mats with different PAO content prepared by electrospinning

|             | PAO content / wt% | PVDF content / wt% | PAAc content / wt% |
|-------------|-------------------|--------------------|--------------------|
| PVDF-g-PAAc | 0                 | 74.4               | 25.6               |
| AC-AO-33    | 33                | 49.8               | 17.2               |
| AC-AO-51.9  | 51.9              | 35.8               | 12.3               |
| AC-AO-65.7  | 65.7              | 25.5               | 8.8                |
| AC-AO-89.4  | 89.4              | 7.9                | 2.7                |
| PAO         | 100               | 0                  | 0                  |

**Table S2.** Comparison of different nanofibrous adsorbents prepared by electrospinning

| Sample      | PAO content / wt% | PAAc content / wt% | Porosity / % | Hydrophilicity | Uranium uptake / mgU g <sup>-1</sup> ads |
|-------------|-------------------|--------------------|--------------|----------------|------------------------------------------|
| PVDF        | 0                 | 0                  | 85.6         | Very poor      | 0.1                                      |
| PVDF-g-PAAc | 0                 | 25.6               | 75.8         | Poor           | 1.19                                     |
| DF-AO-56.6  | 56.6              | 0                  | 69           | Good           | 1.35                                     |
| AC-AO-51.9  | 51.9              | 12.3               | 64.5         | Good           | 3.17                                     |
| PAO         | 100               | 0                  | 52.7         | Excellent      | 1.85                                     |

**Table S3.** Optimized distances (in Å) between U and axial O atoms and the distances between U and

ligand atoms (O and N atoms).

| Complexes                                                            | R(U=O(axial)) | R(U-O(AO <sup>-</sup> )) | R(U-N(AO <sup>-</sup> )) | R(U-O(AC <sup>-</sup> )) |
|----------------------------------------------------------------------|---------------|--------------------------|--------------------------|--------------------------|
| [UO <sub>2</sub> (CO <sub>3</sub> ) <sub>2</sub> (AO)] <sup>3-</sup> | 1.824         | 2.357                    | 2.453                    |                          |
| [UO <sub>2</sub> (CO <sub>3</sub> )(AO) <sub>2</sub> ] <sup>2-</sup> | 1.826         | 2.353                    | 2.447                    |                          |
| [UO <sub>2</sub> (AO) <sub>3</sub> ] <sup>-</sup>                    | 1.826         | 2.349                    | 2.441                    |                          |
| [UO <sub>2</sub> (CO <sub>3</sub> ) <sub>2</sub> (AC)] <sup>3-</sup> | 1.812         |                          |                          | 2.324                    |
| [UO <sub>2</sub> (CO <sub>3</sub> )(AC) <sub>2</sub> ] <sup>2-</sup> | 1.802         |                          |                          | 2.532                    |
| [UO <sub>2</sub> (AC) <sub>3</sub> ] <sup>-</sup>                    | 1.790         |                          |                          | 2.496                    |
| [UO <sub>2</sub> (CO <sub>3</sub> )(AO)(AC)] <sup>2-</sup>           | 1.814         | 2.334                    | 2.423                    | 2.549                    |
| [UO <sub>2</sub> (AO) <sub>2</sub> (AC)] <sup>-</sup>                | 1.816         | 2.328                    | 2.421                    | 2.531                    |
| [UO <sub>2</sub> (AO)(AC) <sub>2</sub> ] <sup>-</sup>                | 1.804         | 2.302                    | 2.400                    | 2.515                    |

## Supplementary Figures

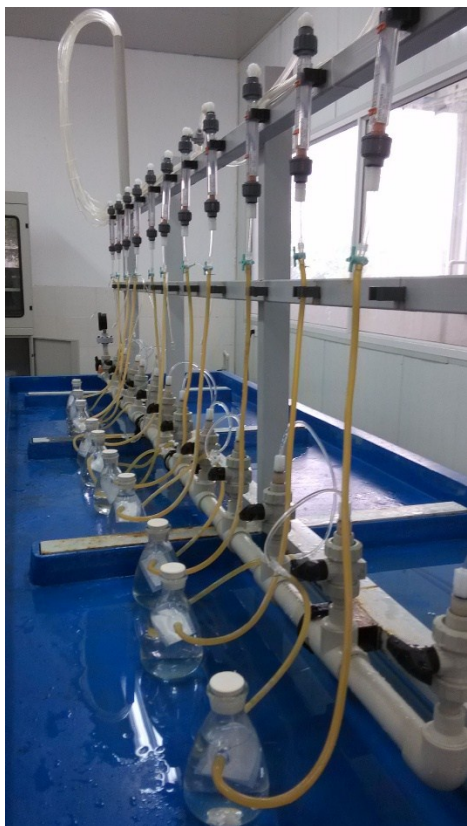

**Figure S1.** The flow-through adsorption test in lab-scale simulated seawater adsorption system

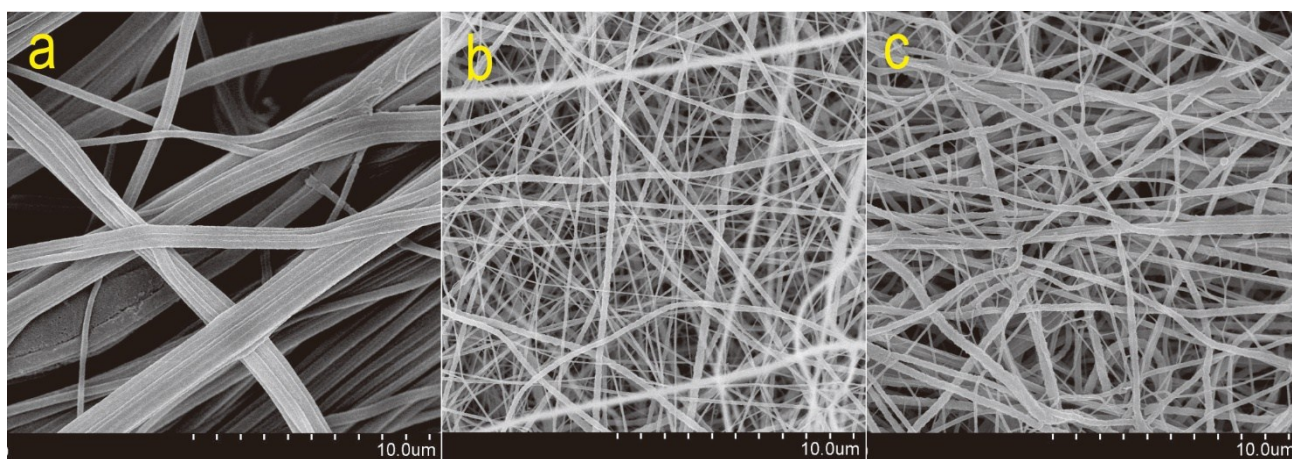

**Figure S2.** SEM images of (a) PAO mat, (b) PVDF-g-PAAc mat, and (c) AC-AO-51.9 composite mat

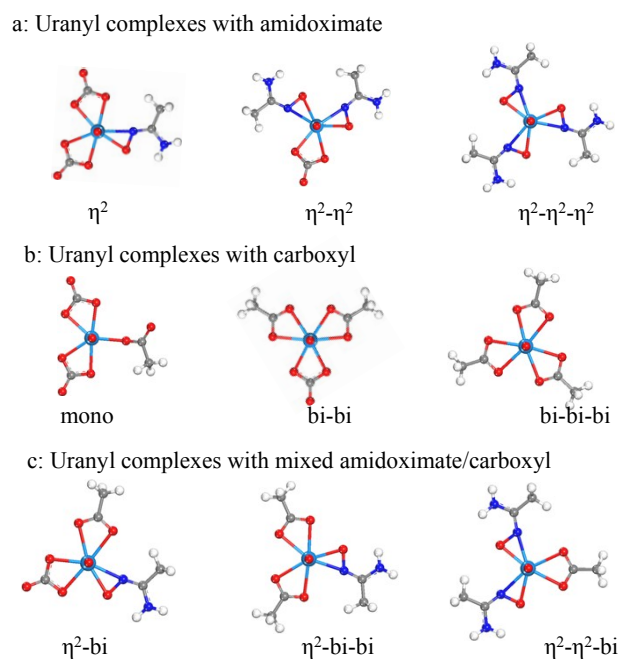

**Figure S3.** Optimized structures for uranyl complexes with amidoximate, uranyl complexes with carboxyl and uranyl complexes with mixed amidoximate/carboxyl

## References

1. H. Sodaye et al. Extraction of uranium from the concentrated brine rejected by integrated nuclear desalination plants. *Desalination* 235 (2009) 9–32.
2. Wang D, Sañudo-Wilhelmy S.A., Development of an analytical protocol for the determination of V (IV) and V (V) in seawater: Application to coastal environments. *Marine Chemistry* 112 (2008) 72–80.
3. Ladd, K. V. 1974. The distribution and assimilation of vanadium with respect to the tunicate *Ciona intestinalis*. Ph.D. thesis, Brandeis Univ. p. 108
4. K.K. Turekian, Handbook of Geochemistry, K.H. Wedepohl, Springer-Verlag, Berlin 1969 p. 309
